# Supplementary material
Source: PubMed Central journal article supplement (PMC4091728)
Supplement: NIHMS597364-supplement-Supporting_Information.pdf [file NIHMS597364-supplement-Supporting_Information.pdf]

# Supporting Information

**Figure S1**

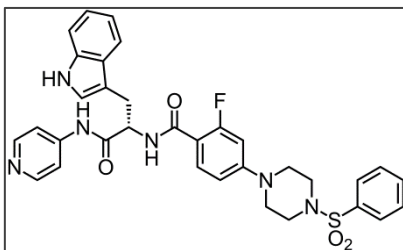

**Figure 1.** Chemical structure of the previously reported *S*-sulfonamide derivative, compound **27r**.

**Figure S2**

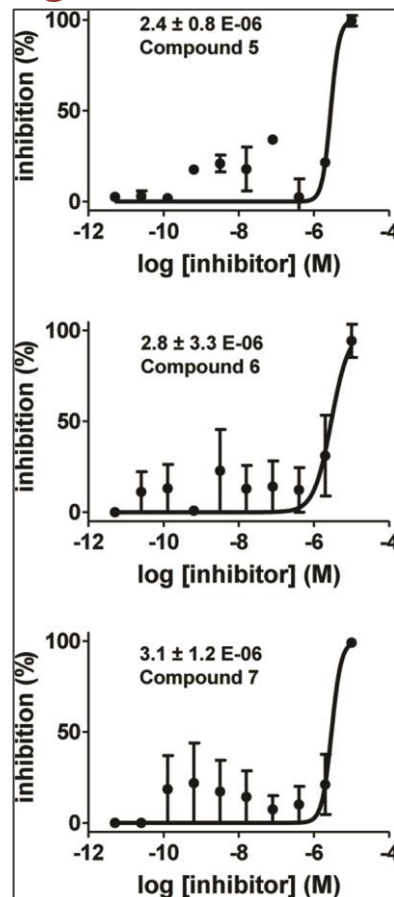

**Figure 2.** Efficacy,  $EC_{50}$ , of sulfonamide derivatives **5-7** in *T. cruzi* cell-based assay.

**Figure S3**

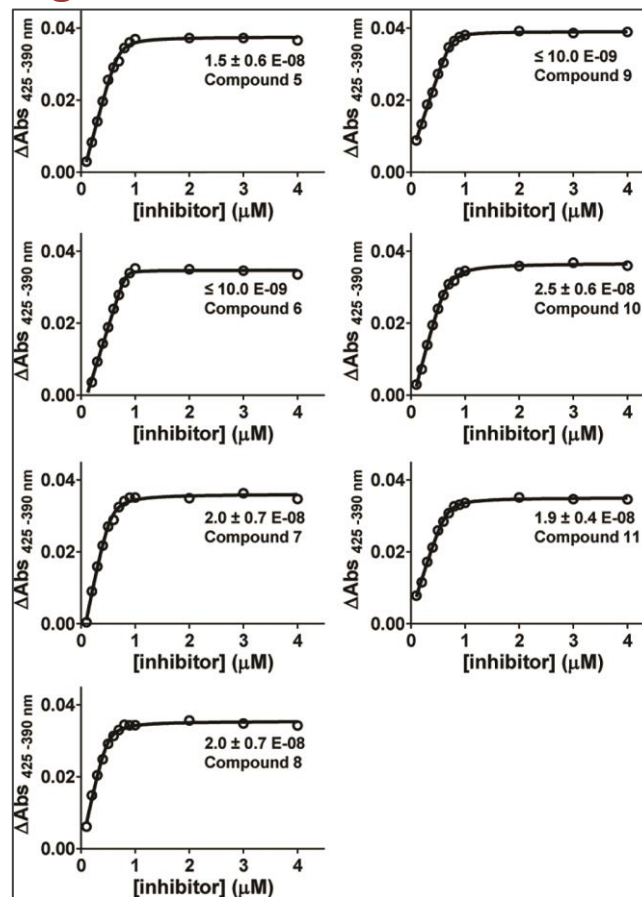

**Figure 3.** UV-vis titration curves for sulfonamide derivatives **5-11** demonstrating virtually stoichiometric linear saturation at sub-micromolar concentrations.
